# Supplementary material for: New insights into the reaction mechanism and the rate-determining step of n-butane hydroisomerisation over reduced MoO3 catalystsElectronic supplementary information (ESI) available: experimental details. See http://www.rsc.org/suppdata/cc/b3/b304978g/
Source: Royal Society of Chemistry journal article supplement (doi:10.1039/b304978g), 2003-01-01
Supplement: b304978g.doc [file b304978g.doc]

# Supplementary data

**Experimental details.**

500 mg of molybdenum oxides (MoO3 or MoO2) from STREM (purity >99.5%) were used for the catalytic tests. Gases were supplied by high-pressure cylinders from l’Air Liquide: U-grade H2, further purified by molecular sieves kept at 77K, and 99.95% *n*-butane (the main impurities of which were *trans*-but-2-ene (390 ppm), *iso*-butane (250 ppm) and propane (230 ppm)). The catalytic data were corrected for the level of impurities. Gas flows were regulated by Tylan FC260 mass flow controllers. The catalytic activity was measured at 623K, at a total pressure of 1 bar (7 kPa *n*-butane + 93 kPa H2) and a total flow rate of 86.5 cm3 min-1.

A micro-pilot made of stainless steel and pyrex-glass was used, the whole length of the lines being kept at around 383K. A quartz U-shaped reactor was heated by an oven with a small temperature gradient (<3 K) along all its length. The gas mixture was preheated to the reaction temperature by passing the reactants over heated silica beads before introducing it to the catalyst bed, which was supported on a silica frit. Gas samples were extracted by a syringe *via* a septum for GC analysis. The gas chromatograph (model Hewlett-Packard 5890 Series II) was equipped with a PONA capillary column and a flame ionisation detector. A temperature programme starting at 252 K was required to obtain a good separation of the different products, especially *iso*-butene and but-1-ene. The thermodynamic data were calculated using the HSC software (version 4.1, © Outokumpu Research Oy, Pori, Finland, A. Roine).
